# Supplementary material
Source: HighWire-hosted journal article supplement (https://jmg.bmj.com/content/jmg-2024-109896)

a

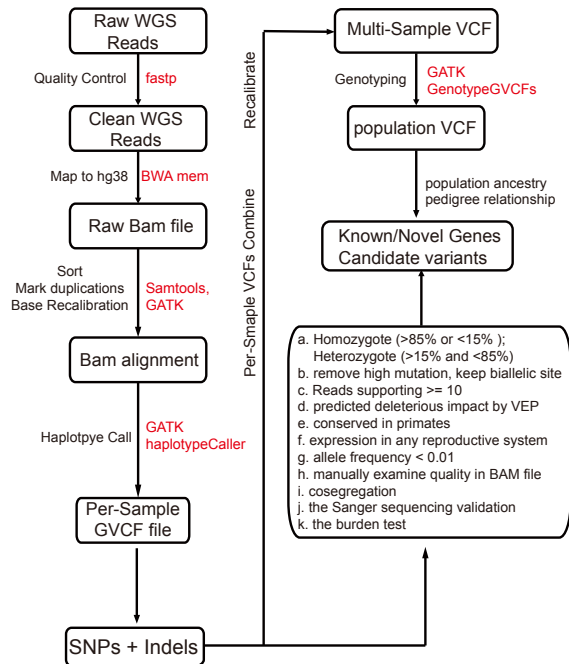

b

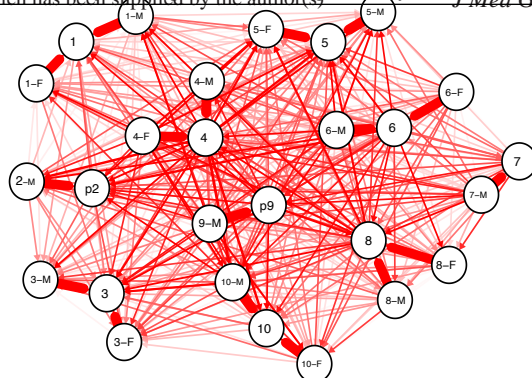

c

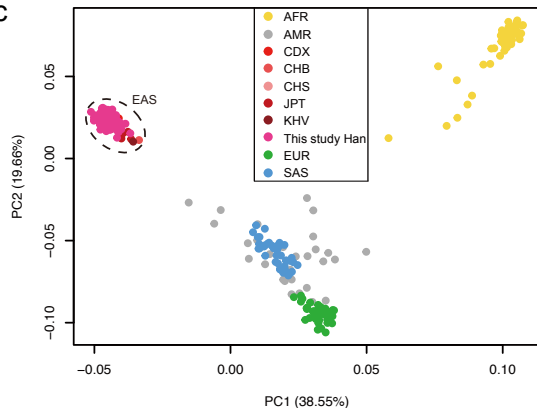

Supplement: inline-supplementary-material-2 [file inline-supplementary-material-2.pdf]

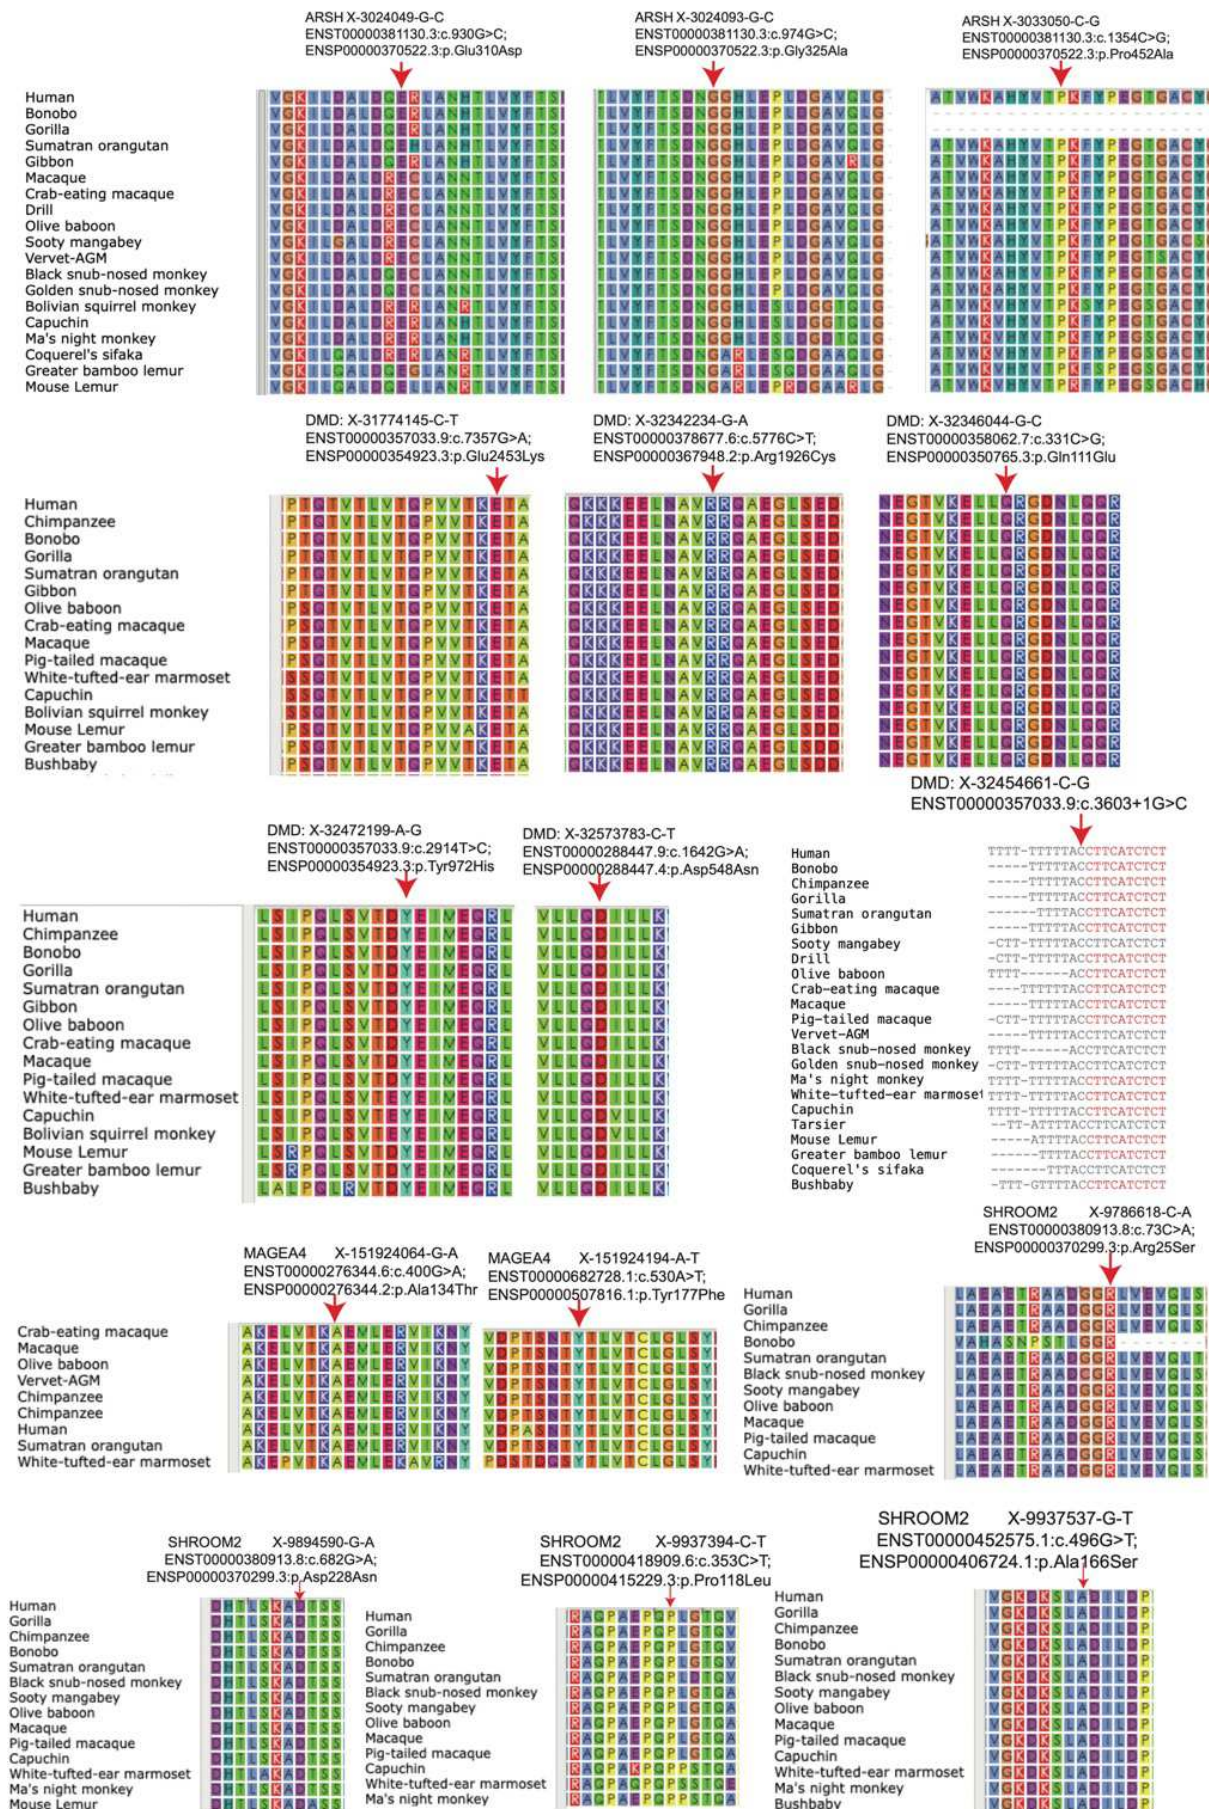

Supplement: inline-supplementary-material-5 [file inline-supplementary-material-5.pdf]
